# Supplementary material for: Spray-coatable ionogels based on silane-ionic liquids for low voltage, flexible, electrolyte-gated organic transistors
Source: Royal Society of Chemistry journal article supplement (doi:10.1039/c3tc32465f), 2014-01-01
Supplement: c3tc32465f1.pdf [file c3tc32465f1.pdf]

## Supporting Information

### Spray-Coatable Ionogels Based on Silane-Ionic Liquids for Low Voltage, Flexible, Electrolyte-gated Organic Transistors

*S. Thiemann, S. J. Sachnov, M. Gruber, F. Gannott, S. Spallek, M. Schweiger, J. Krückel, J. Kaschta, E. Spiecker, P. Wasserscheid and J. Zaumseil*

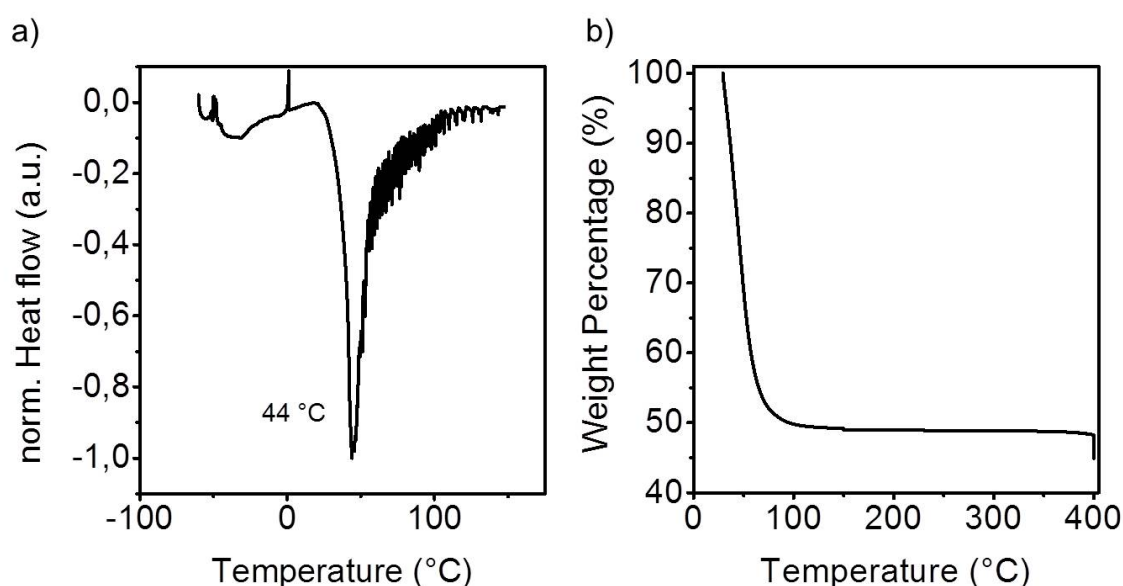

**Figure S1.**

(a) Differential scanning calorimetry (DSC) and (b) thermal gravimetric analysis (TGA) of silane-based ionogel precursor with a molar ratio of FA:TMOS:[(EtO)<sub>3</sub>SiPMIM][TFSI] = 61:1:3 at a heating rate of 10 K/min in ambient air.

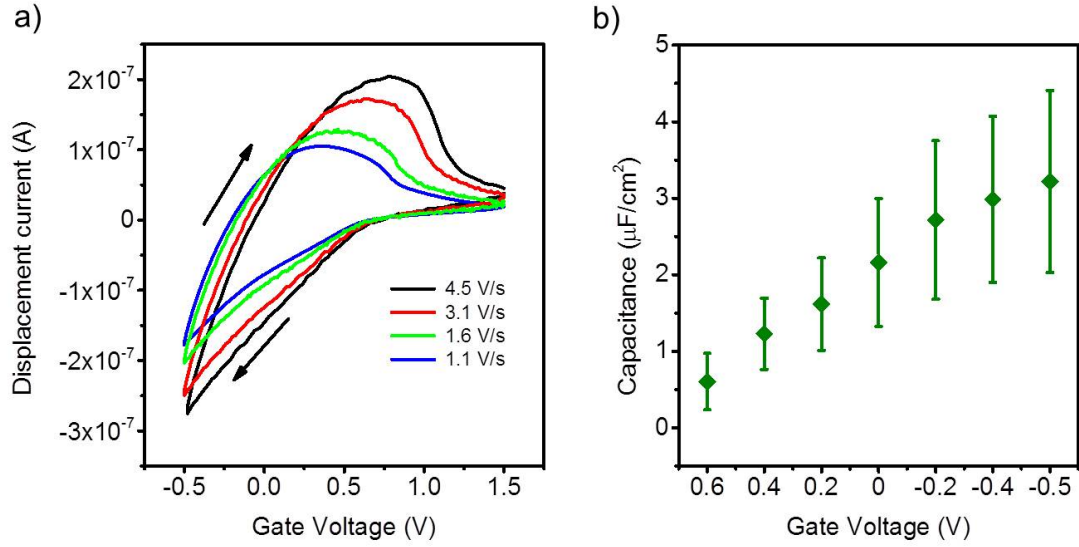

**Figure S2.**

a) Displacement current measurements for ionogel-gated P3HT-FETs (source and drain electrode grounded) at various sweep rates for silane-based spraycoated ionogels. The channel area was used to calculate the capacitance from the forward sweep according to:

$$I_{disp}(V_g) = A \cdot C_i(V_g) \frac{dV_g}{dt}$$

b) Extracted areal capacitance at different gate voltages from +0.6 V to -0.5V (averaged over 5 devices).

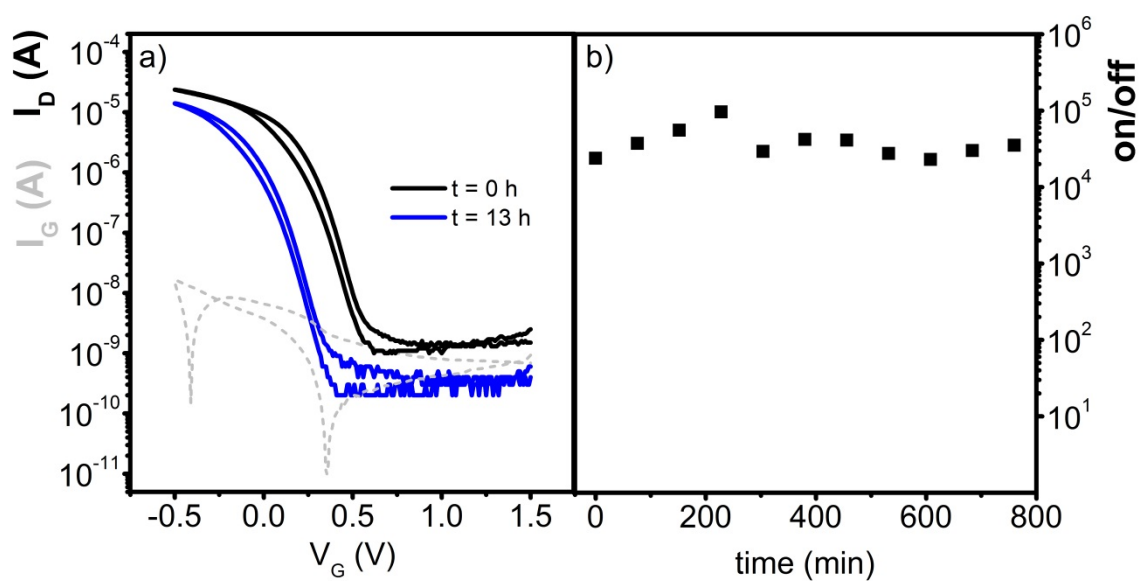

**Figure S3.**

**Stability of P3HT-FET** with spray-coated silane-based ionogel in nitrogen atmosphere: a) transfer characteristics at start and after 13 h (one transfer sweep every 5 min,  $V_{DS} = 1.0$  V), b) on/off current ratio vs. time.
